# Supplementary material for: Temperature-controlled reversible exfoliation-stacking of titanate nanosheets in an aqueous solution containing tetraalkylammonium ions
Source: Royal Society of Chemistry journal article supplement (doi:10.1039/c3ra47233g), 2014-01-01
Supplement: c3ra47233g.pdf [file c3ra47233g.pdf]

## Temperature-controlled reversible exfoliation-stacking of titanate nanosheets

K. Kamada, N. Soh

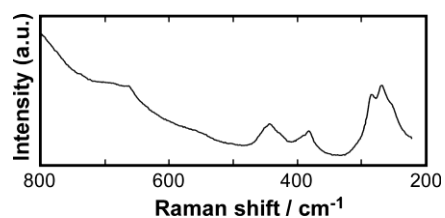

**Figure 1S** Raman spectrum of solid state TBA<sup>+</sup>-TiO<sub>x</sub> prepared by drying the colloidal solution.

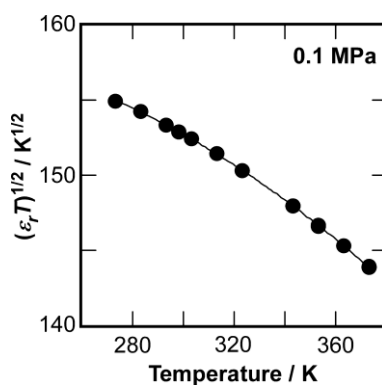

**Figure 2S** Temperature dependence of  $(\epsilon_r T)^{1/2}$  term of water. Static dielectric constants of water at different temperatures are cited from Ref. 20.
